# Supplementary material
Source: publisher figshare collection journal article supplement (https://sage.figshare.com/ndownloader/files/20109113)
Supplement: Supplementary file 1 [file 20109113]

Supplemental Table. Characteristics of preference-concordant versus discordant CRC screening (N=230 patients)

| Percentage=row percent       | Discordant<br>(N=37) | Concordant<br>(N=193) | Total<br>(N=230) | <i>p</i> -value   |
|------------------------------|----------------------|-----------------------|------------------|-------------------|
| <b>Intervention Group</b>    |                      |                       |                  | <b>&lt; 0.001</b> |
| Web                          | 10 (28.6%)           | 25 (71.4%)            | 35 (100.0%)      |                   |
| Phone                        | 5 (4.7%)             | 102 (95.3%)           | 107 (100.0%)     |                   |
| Web + Phone                  | 22 (25.0%)           | 66 (75.0%)            | 88 (100.0%)      |                   |
| <b>Age</b>                   |                      |                       |                  | <b>0.032</b>      |
| Mean (SD)                    | 56.8 (5.0)           | 59.1 (5.9)            | 58.7 (5.8)       |                   |
| Range                        | 51.7 - 71.8          | 50.5 - 75.6           | 50.5 - 75.6      |                   |
| <b>Marital Status</b>        |                      |                       |                  | 0.137             |
| Not Married                  | 15 (21.1%)           | 56 (78.9%)            | 71 (100.0%)      |                   |
| Married                      | 21 (13.4%)           | 136 (86.6%)           | 157 (100.0%)     |                   |
| <b>Race</b>                  |                      |                       |                  | 0.115             |
| White                        | 30 (14.5%)           | 177 (85.5%)           | 207 (100.0%)     |                   |
| Black                        | 5 (27.8%)            | 13 (72.2%)            | 18 (100.0%)      |                   |
| Other                        | 2 (40.0%)            | 3 (60.0%)             | 5 (100.0%)       |                   |
| <b>Income</b>                |                      |                       |                  | 0.793             |
| <= \$30,000                  | 7 (13.5%)            | 45 (86.5%)            | 52 (100.0%)      |                   |
| \$30-75,000                  | 18 (17.0%)           | 88 (83.0%)            | 106 (100.0%)     |                   |
| >= \$75,000                  | 12 (17.9%)           | 55 (82.1%)            | 67 (100.0%)      |                   |
| <b>Education</b>             |                      |                       |                  | <b>0.018</b>      |
| High School or Less          | 5 (8.2%)             | 56 (91.8%)            | 61 (100.0%)      |                   |
| Some College                 | 11 (13.1%)           | 73 (86.9%)            | 84 (100.0%)      |                   |
| Bachelor's or Higher         | 21 (24.7%)           | 64 (75.3%)            | 85 (100.0%)      |                   |
| <b>Doctor Visits</b>         |                      |                       |                  | 0.319             |
| Has Not Seen Doctor          | 4 (25.0%)            | 12 (75.0%)            | 16 (100.0%)      |                   |
| Has Seen Doctor >=1<br>Times | 33 (15.5%)           | 180 (84.5%)           | 213 (100.0%)     |                   |
| <b>Insurance Status</b>      |                      |                       |                  | 0.133             |
| Has Insurance<br>Coverage    | 31 (14.9%)           | 177 (85.1%)           | 208 (100.0%)     |                   |
| Has No Insurance<br>Coverage | 6 (27.3%)            | 16 (72.7%)            | 22 (100.0%)      |                   |
| <b>BMI</b>                   |                      |                       |                  | 0.277             |
| Underweight/Normal           | 11 (21.2%)           | 41 (78.8%)            | 52 (100.0%)      |                   |
| Overweight                   | 7 (11.9%)            | 52 (88.1%)            | 59 (100.0%)      |                   |
| Obese                        | 14 (12.5%)           | 98 (87.5%)            | 112 (100.0%)     |                   |

|                                                   |             |             |              |       |
|---------------------------------------------------|-------------|-------------|--------------|-------|
| <b>Doctor Recommend Colonoscopy?</b>              |             |             |              | 0.773 |
| No or Not Sure                                    | 12 (17.1%)  | 58 (82.9%)  | 70 (100.0%)  |       |
| Yes                                               | 25 (15.6%)  | 135 (84.4%) | 160 (100.0%) |       |
| <b>Doctor Recommend SBT?</b>                      |             |             |              | 0.654 |
| No or Not Sure                                    | 20 (15.2%)  | 112 (84.8%) | 132 (100.0%) |       |
| Yes                                               | 17 (17.3%)  | 81 (82.7%)  | 98 (100.0%)  |       |
| <b>Baseline Stage Colonoscopy</b>                 |             |             |              | 0.314 |
| Pre-contemplation                                 | 27 (14.8%)  | 155 (85.2%) | 182 (100.0%) |       |
| Contemplation                                     | 10 (20.8%)  | 38 (79.2%)  | 48 (100.0%)  |       |
| <b>Baseline Stage SBT</b>                         |             |             |              | 0.212 |
| Pre-contemplation                                 | 34 (17.3%)  | 162 (82.7%) | 196 (100.0%) |       |
| Contemplation                                     | 3 (8.8%)    | 31 (91.2%)  | 34 (100.0%)  |       |
| <b>Fatalism Total Score</b>                       |             |             |              | 0.239 |
| Mean (SD)                                         | 19.1 (6.9)  | 20.5 (6.9)  | 20.3 (6.9)   |       |
| Range                                             | 11.0 - 33.0 | 11.0 - 45.0 | 11.0 - 45.0  |       |
| <b>Fear Total Score</b>                           |             |             |              | 0.700 |
| Mean (SD)                                         | 21.9 (8.8)  | 22.5 (8.0)  | 22.4 (8.1)   |       |
| Range                                             | 8.0 - 40.0  | 8.0 - 40.0  | 8.0 - 40.0   |       |
| <b>Susceptibility to Colon Cancer Total Score</b> |             |             |              | 0.590 |
| Mean (SD)                                         | 6.5 (3.0)   | 6.8 (2.0)   | 6.7 (2.2)    |       |
| Range                                             | 3.0 - 15.0  | 3.0 - 12.0  | 3.0 - 15.0   |       |
| <b>Benefits of CRC Screening Total Score</b>      |             |             |              | 0.025 |
| Mean (SD)                                         | 19.2 (3.3)  | 18.0 (3.1)  | 18.2 (3.2)   |       |
| Range                                             | 11.0 - 25.0 | 5.0 - 25.0  | 5.0 - 25.0   |       |
| <b>Barriers to SBT Total Score</b>                |             |             |              | 0.725 |
| N-Miss                                            | 0           | 1           | 1            |       |
| Mean (SD)                                         | 19.1 (5.0)  | 19.4 (4.8)  | 19.4 (4.8)   |       |
| Range                                             | 8.0 - 28.0  | 8.0 - 32.0  | 8.0 - 32.0   |       |
|                                                   |             |             |              | 0.253 |

|                                                  |             |             |              |       |
|--------------------------------------------------|-------------|-------------|--------------|-------|
| <b>Barriers to Colonoscopy Total Score</b>       |             |             |              |       |
| Mean (SD)                                        | 33.8 (8.5)  | 35.6 (8.4)  | 35.3 (8.4)   |       |
| Range                                            | 14.0 - 48.0 | 14.0 - 54.0 | 14.0 - 54.0  |       |
| <b>Self-Efficacy for SBT Total Score</b>         |             |             |              | 0.625 |
| Mean (SD)                                        | 29.2 (4.1)  | 28.8 (4.5)  | 28.9 (4.5)   |       |
| Range                                            | 16.0 - 32.0 | 8.0 - 32.0  | 8.0 - 32.0   |       |
| <b>Self-Efficacy for Colonoscopy Total Score</b> |             |             |              | 0.258 |
| Mean (SD)                                        | 38.4 (4.7)  | 37.0 (7.0)  | 37.3 (6.7)   |       |
| <b>CRC/CRC Screening Knowledge Score</b>         |             |             |              | 0.842 |
| Mean (SD)                                        | 5.4 (1.6)   | 5.4 (1.9)   | 5.4 (1.8)    |       |
| Range                                            | 3.0 - 9.0   | 0.0 - 10.0  | 0.0 - 10.0   |       |
| <b>Prior SBT Completion</b>                      |             |             |              | 0.097 |
| Ever had SBT                                     | 15 (22.4%)  | 52 (77.6%)  | 67 (100.0%)  |       |
| Never had SBT                                    | 21 (13.5%)  | 135 (86.5%) | 156 (100.0%) |       |
| <b>Prior Colonoscopy Completion</b>              |             |             |              | 0.193 |
| Ever had colonoscopy                             | 11 (21.6%)  | 40 (78.4%)  | 51 (100.0%)  |       |
| Never had colonoscopy                            | 25 (14.0%)  | 153 (86.0%) | 178 (100.0%) |       |
| <b>Prior SBT or Colonoscopy Completion</b>       |             |             |              | 0.058 |
| Ever had SBT or colonoscopy                      | 21 (20.6%)  | 81 (79.4%)  | 102 (100.0%) |       |
| Never had SBT or colonoscopy                     | 14 (11.4%)  | 109 (88.6%) | 123 (100.0%) |       |

*Note.* SD = standard deviation; BMI = body mass index; SBT = stool blood test; CRC = colorectal cancer. Analyses do not control for familywise error rates.
